# Supplementary material for: Amide group-containing polar solvents as ligands for iron-catalyzed atom transfer radical polymerization of methyl methacrylate
Source: Royal Society of Chemistry journal article supplement (doi:10.1039/c5ra05460e), 2015-01-01
Supplement: c5ra05460e1.pdf [file c5ra05460e1.pdf]

## Amide group-containing polar solvents as ligands for iron-catalyzed atom transfer radical polymerization of methyl methacrylate

Jun Zhou,<sup>a</sup> Jirong Wang,<sup>a</sup> Jianyu Han,<sup>a</sup> Dan He,<sup>b</sup> Danfeng Yang,<sup>a</sup> Zhigang Xue,<sup>\*a</sup> Yonggui Liao<sup>a</sup> and Xiaolin Xie<sup>\*a</sup>

<sup>a</sup> Key Laboratory for Large-Format Battery Materials and Systems, Ministry of Education, School of Chemistry and Chemical Engineering, Huazhong University of Science and Technology, Wuhan 430074, China. Fax: +86 27 87543632; Tel: +86 27 87793241; E-mail: zgxue@mail.hust.edu.cn; xlxie@mail.hust.edu.cn

<sup>b</sup> Key Laboratory of Optoelectronic Chemical Materials and Devices of Ministry of Education, School of Chemical and Environmental Engineering, Jiangnan University, Wuhan 430056, China.

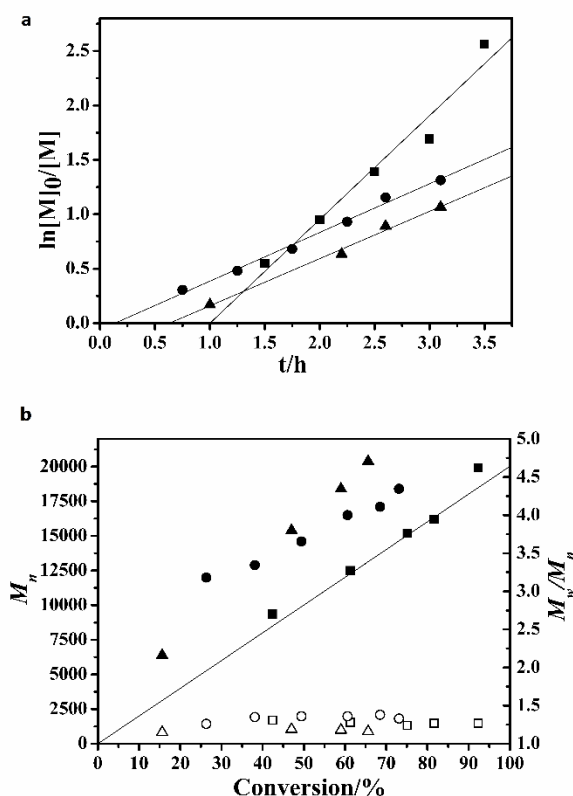

**Fig. S1** (a) Kinetic plots of  $\ln([M]_0/[M])$  verses time and (b) plots of  $M_n$  (filled symbols) and  $M_w/M_n$  (open symbols) values verses conversion for  $\text{FeBr}_2$ -catalyzed ATRP of MMA using different polar solvents as ligands.  $[\text{MMA}]_0/[\text{EBPA}]_0/[\text{FeBr}_2]_0/[\text{Na}_2\text{CO}_3]_0 = 200:1:1:2$ ,  $[\text{MMA}]_0/[\text{solvent}]_0=2:1(\text{v/v})$ ,  $60^\circ\text{C}$ . ■ = DMAc; ▲ = TMU; ● = 2-Py.

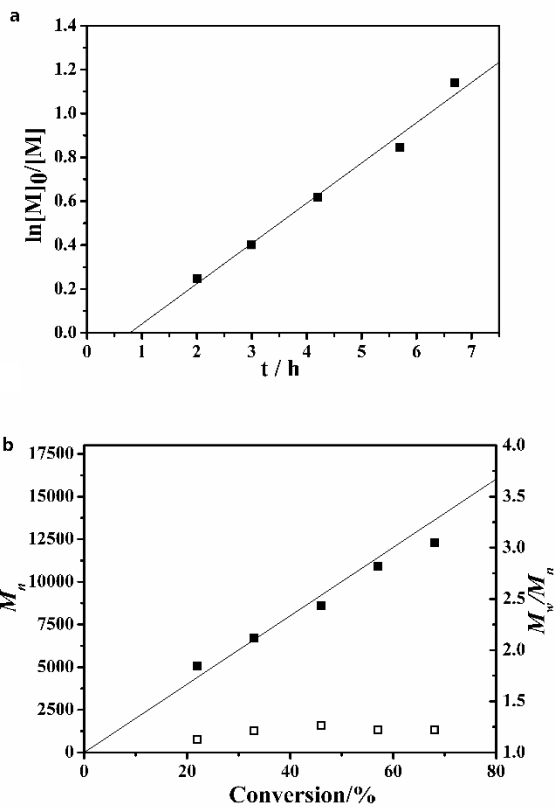

**Fig. S2** (a) Kinetic plots of  $\ln([M]_0/[M])$  versus time and (b) plots of  $M_n$  (filled symbols) and  $M_w/M_n$  (open symbols) values versus conversion for  $\text{FeBr}_2/\text{NMP}$ -catalyzed ATRP of MMA.  $[\text{MMA}]_0/[\text{EBPA}]_0/[\text{FeBr}_2]_0/[\text{NMP}]_0/[\text{Na}_2\text{CO}_3]_0 = 200:1:1:20:2$ ,  $60\text{ }^\circ\text{C}$ .
